# Supplementary material for: FLVCR1a Controls Cellular Cholesterol Levels through the Regulation of Heme Biosynthesis and Tricarboxylic Acid Cycle Flux in Endothelial Cells
Source: MDPI journal article supplement (doi:10.3390/biom14020149), 2024-01-26
Supplement: s1 [file s1]

# Supplementary Figure 1

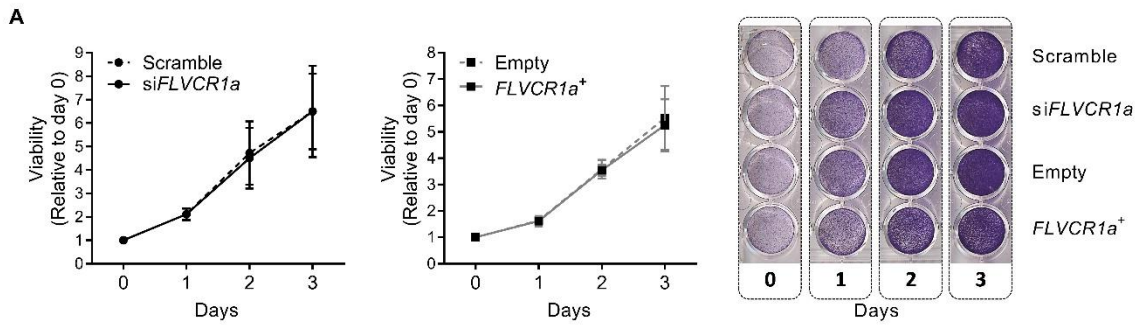

## Figure S1. Sk-Hep1 cells viability upon the modulation of FLVCR1a expression

(A) Cell viability was assessed through crystal violet assay. Values are expressed as fold increase at 1, 2, 3 days over day 0 (namely 24h after plating) (left and middle panel). Representative images of cells stained with crystal violet at the analysed time points (right panel). Data are expressed as mean  $\pm$  SEM (silencing, n=3, three independent experiments; overexpression, n=4, four independent experiments).

siFLVCR1a: FLVCR1a-silenced cells; scramble: respective control; FLVCR1a<sup>+</sup>: FLVCR1a-overexpressing cells; Empty: respective control.

**Supplementary Figure 2**

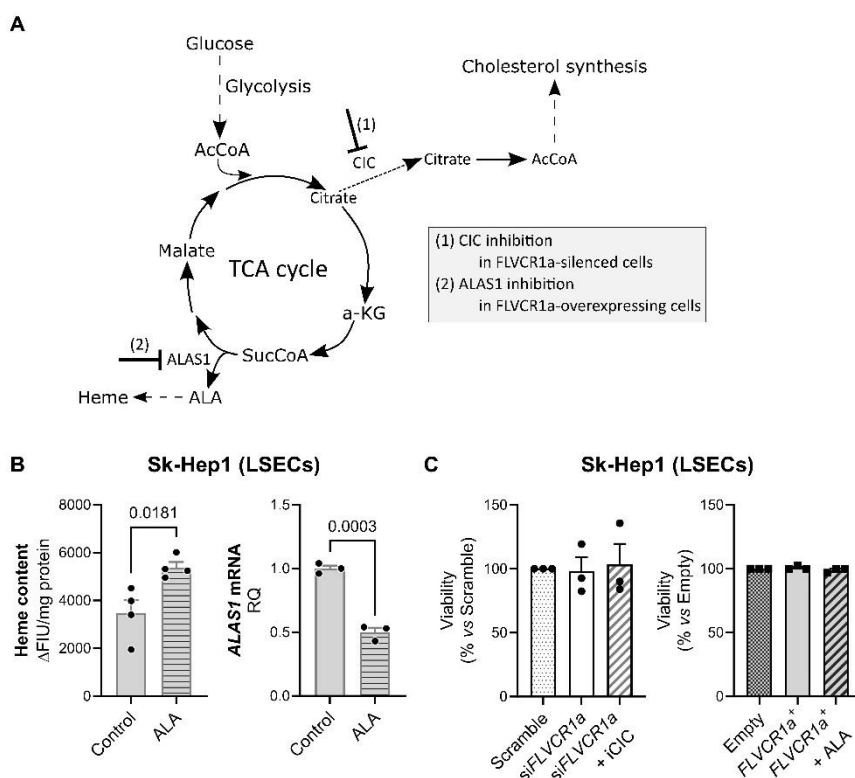

**Figure S2. Treatment of Sk-Hep1 cells with iCIC or ALA.**

(A) Schematic representation of TCA cycle, heme and cholesterol biosynthetic pathways, as well as of rescue approaches. Citrate export (from mitochondria to cytosol) was inhibited in *FLVCR1a*-silenced cells (1), whereas heme synthesis was inhibited in *FLVCR1a* overexpressing cells (2) by treating the cells with iCIC and ALA, respectively, for 24h. AcCoA, acetyl-CoA; SucCoA, succinyl-CoA; a-KG,  $\alpha$ -ketoglutarate; ALAS1, ALA-synthase; CIC, citrate carrier; TCA, tricarboxylic acid; ALA,  $\delta$ -aminolevulinic acid.

(B) Intracellular heme content (left panel) and mRNA expression levels of *ALAS1* (right panel) in Sk-Hep1 cells upon treatment with ALA. (Left panel) Intracellular heme content is expressed as fluorescence ( $\Delta$ FIU)/mg protein. (Right panel) Normalization was made using 18S as housekeeping gene. Data are expressed as mean  $\pm$  SEM of relative quantification using the  $2^{-\Delta\Delta C_t}$  method over their respective controls (n=3). Unpaired t-test was performed.

(C) Cell viability upon iCIC and ALA treatment was assessed through crystal violet assay. Values are expressed as percentage (%) compared their respective control cells (scramble or empty). Data are expressed as mean  $\pm$  SEM (n=3, three independent experiments). One-way ANOVA test was performed.

siFLVCR1a: *FLVCR1a*-silenced cells; scramble: respective control; *FLVCR1a*<sup>+</sup>: *FLVCR1a*-overexpressing cells; Empty: respective control; iCIC: mitochondrial citrate carrier inhibitor; ALA:  $\delta$ -aminolevulinic acid (heme synthesis inhibitor).
